# Supplementary material
Source: PubMed Central journal article supplement (PMC7865127)
Supplement: pnas.2012229118.sapp.pdf [file pnas.2012229118.sapp.pdf]

# Supplementary information for

## Nanopore mediated protein delivery enabling 3-color single molecule tracking in living cells

Zhongwen Chen <sup>1,2\*</sup>, Yuhong Cao <sup>2\*</sup>, Chun-Wei Lin <sup>2</sup>, Steven Alvarez <sup>3</sup>, Dongmyung Oh <sup>4</sup>,  
Peidong Yang <sup>2,3#</sup>, Jay T. Groves <sup>2#</sup>

1. Multiscale Research Institute of Complex Systems, Fudan University, Shanghai 200433, China
2. Department of Chemistry, University of California, Berkeley, CA 94720, US
3. Department of Materials Science and Engineering, University of California, Berkeley, CA 94720, US
4. Mechanobiology Institute, National University of Singapore, 117411, Singapore

\* These authors contribute equally

# Corresponding to [jtgroves@lbl.gov](mailto:jtgroves@lbl.gov) or [p\\_yang@berkeley.edu](mailto:p_yang@berkeley.edu)

## Supplementary Movies

Movie 1 EGF stimulated recruitment of intracellularly delivered Grb2-AF647 onto plasma membrane in HeLa cells. Scale bar is 5  $\mu\text{m}$  for all movies.

Movie 2 Grb2-AF488 single molecule imaging in HeLa cells

Movie 3 SOS-HaloTag-JF549 single molecule imaging in HeLa cells

Movie 4 Simultaneously single molecule imaging of Grb2-AF647 and SOS-HaloTag-JF549 in HeLa cells

Movie 5 Simultaneously single molecule imaging of Grb2-AF647 and Src-HaloTag-JF549 in HeLa cells

Movie 6 RBD-AF647 single molecule imaging in HeLa cells

Movie 7 RBD-R59A-AF647 single molecule imaging in HeLa cells

Movie 8 Simultaneously 3-color single molecule imaging of Grb2-AF488, SOS-HaloTag-JF549 and RBD-AF647 in HeLa cells

Movie 9 Bulk delivery of RBD-AF647 in mouse T cells

Movie 10 Single molecule delivery of RBD-AF647 in mouse T cells

# Figure S1

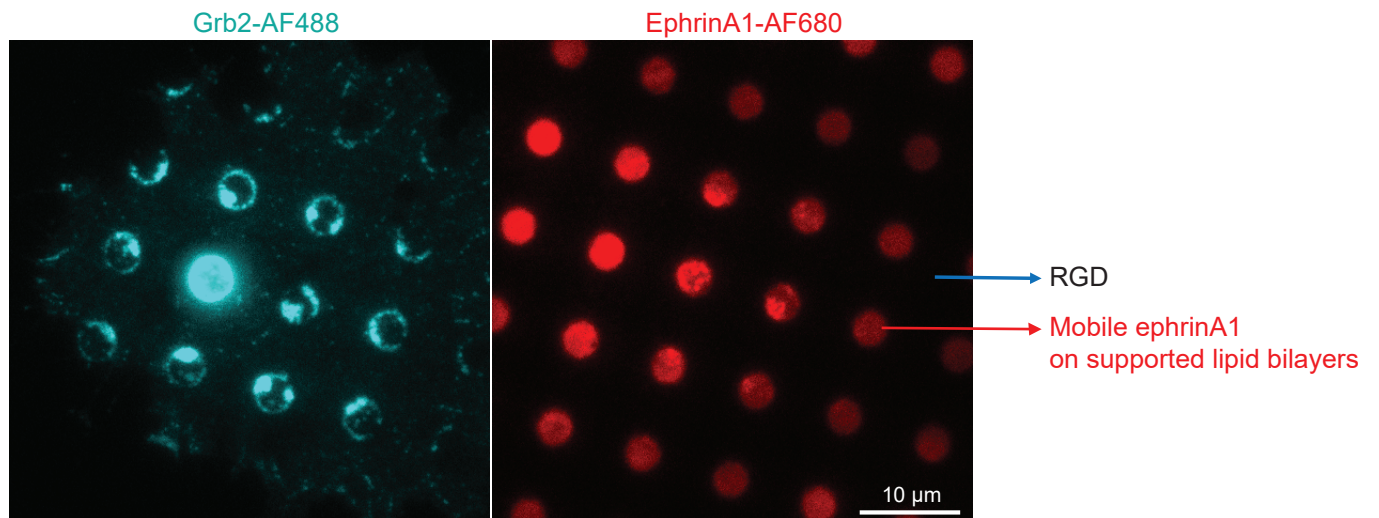

Figure S1. Grb2-AF488 delivered COS7 cells spread on ephrinA1-SLBs and RGD substrate

Figure S2

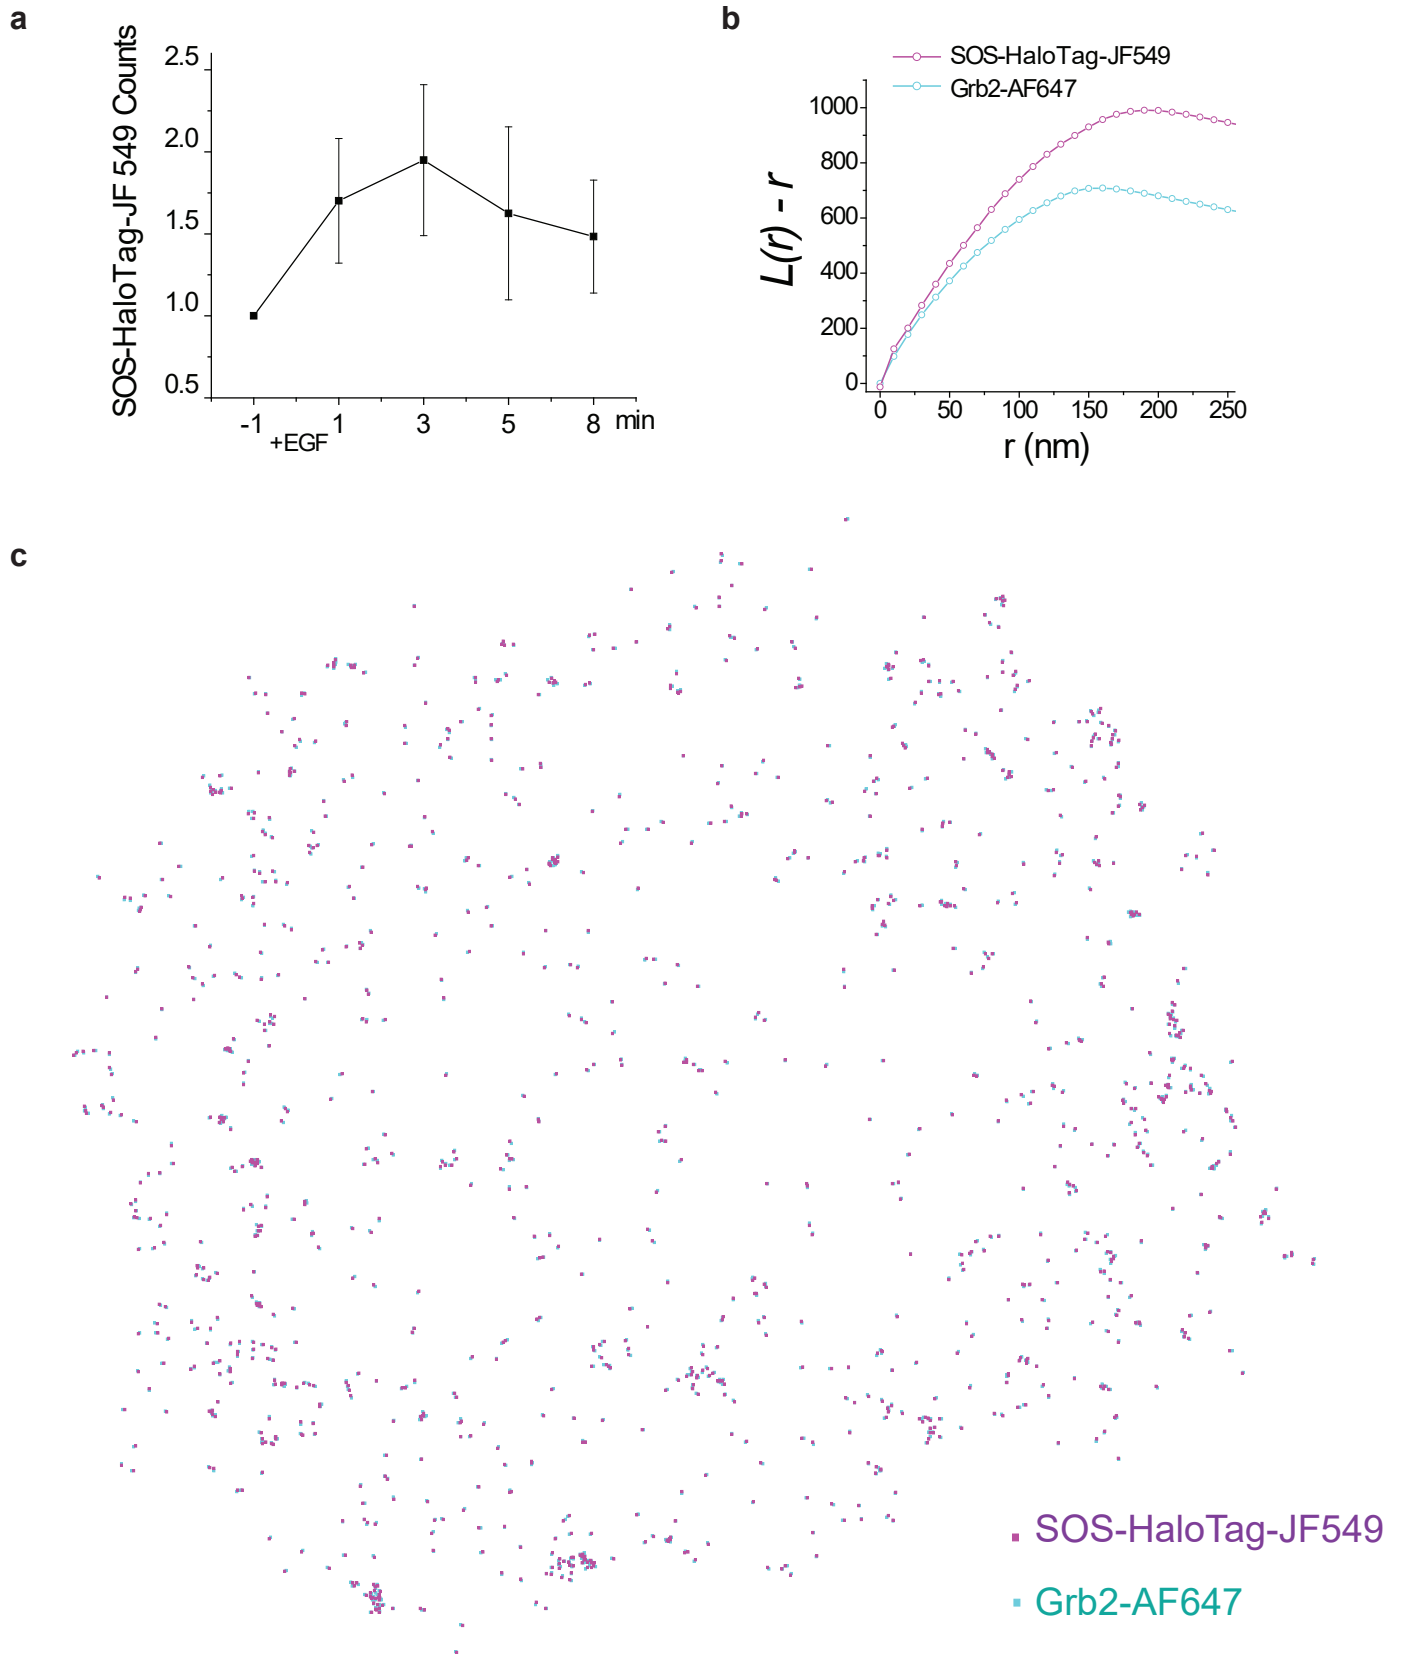

Figure S2. (a) Counts of SOS-HaloTag-JF549 molecule appearances in each 1.5 sec recording period as response to EGF stimulation. N=6 cells, error bar shown as standard deviation. (b) Cluster analysis of Grb2-AF647 and SOS-HaloTag-JF549. (c) Isolation of Grb2-AF647 and SOS-HaloTag-JF549 doublets.

Figure S3

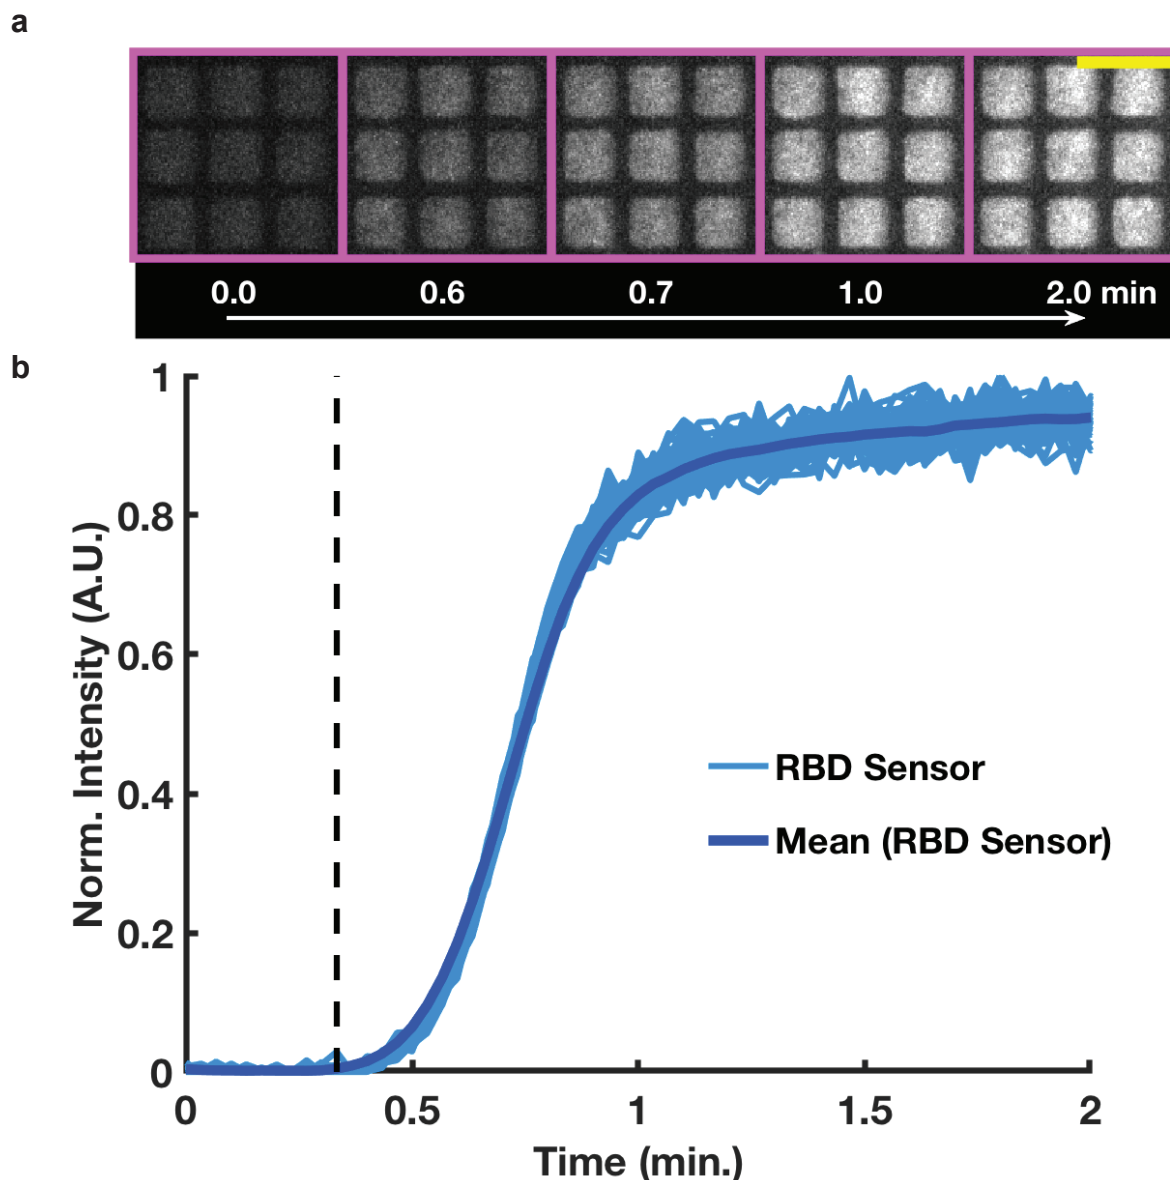

Figure S3. NHS ester labeled RBD sensor is sensitive to Ras activation state. GEF-mediated activation of H-Ras reconstituted on micropatterned supported membranes and monitored with RBD labeled via NHS ester chemistry. A micropatterned membrane functionalized with GDP-bound H-Ras was exposed to 40nM of SOS-Cat (the minimal catalytic core of the GEF Son of Sevenless) and 1 mM GTP to initiate the reaction. (a) Montage of TIRF images monitoring binding of AF647 labeled RBD to active Ras and (b) corresponding reaction trajectories ( $n=55$ ). Scalebar on (a) is 10  $\mu$ m.

# Figure S4

**a**

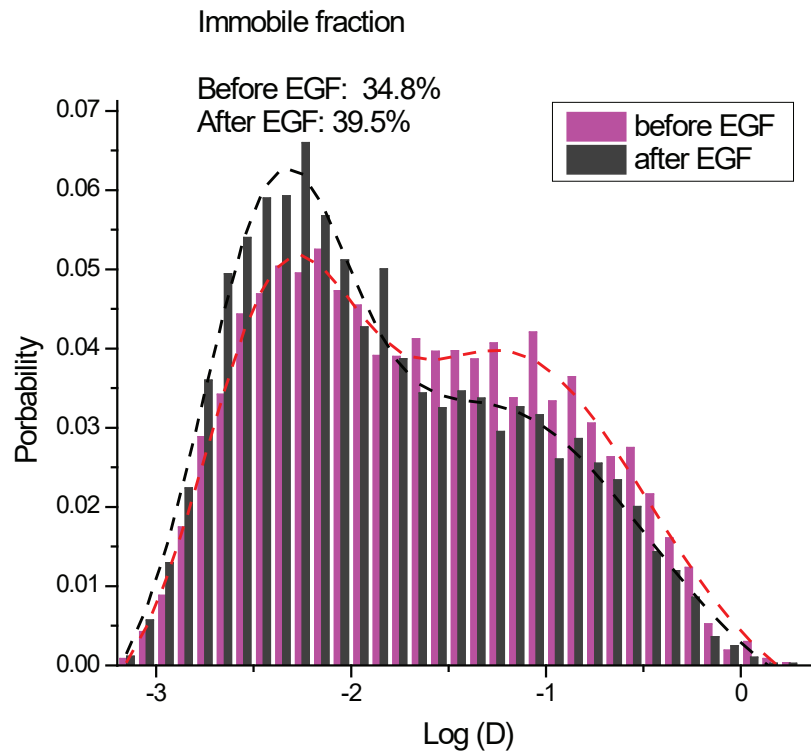

**b**

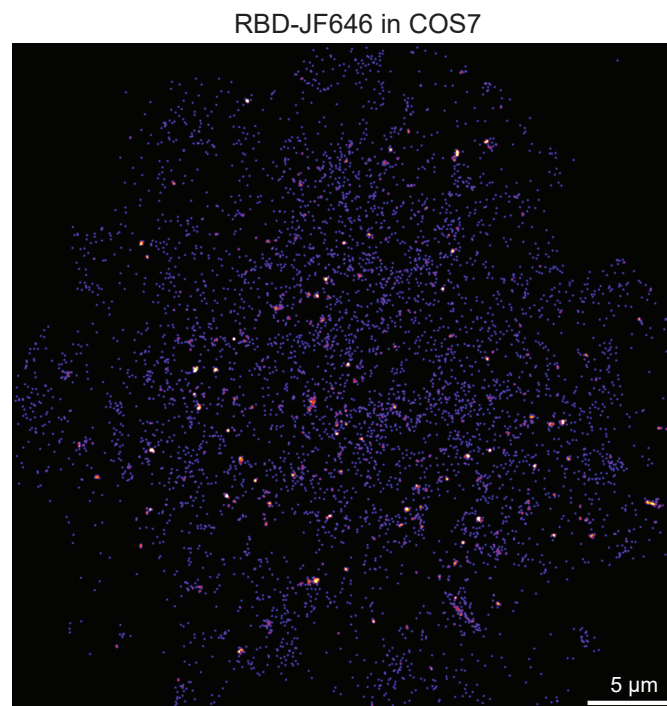

Figure S4. (a) Distribution of RBD-AF647 diffusion coefficient (D) from each molecular trajectory before or after EGF stimulation. N=10 cells. (b) Reconstructed frequency image of RBD-JF646 single molecule recruitment after EGF stimulation in COS7 cells.

Figure S5

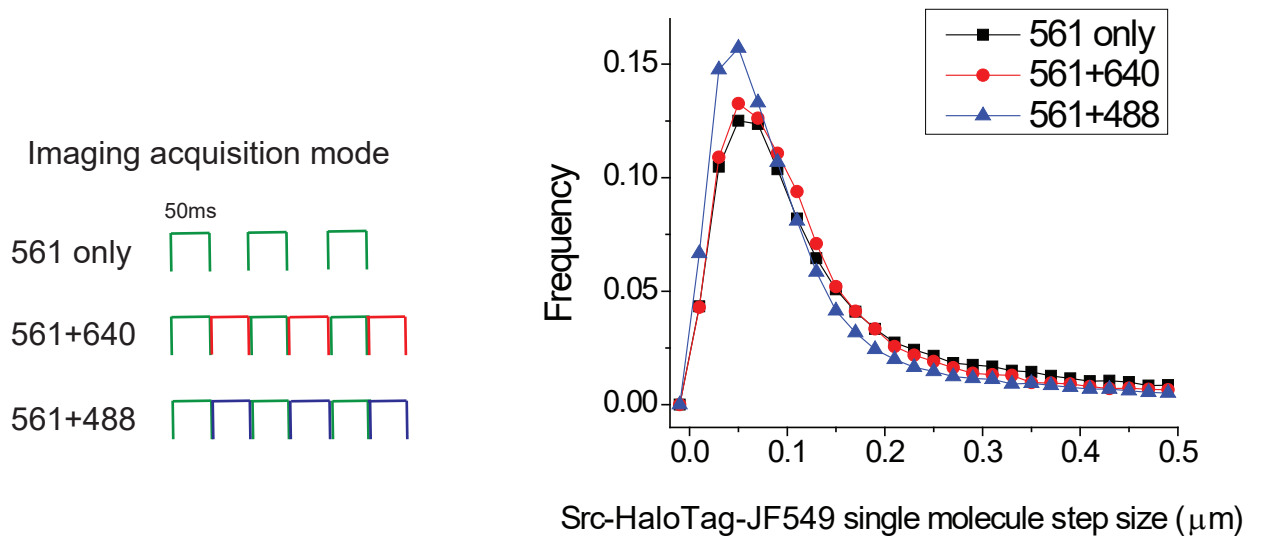

Figure S5. Src-HaloTag-JF549 single molecule step size analysis with different acquisition mode.
